# Supplementary material
Source: publisher site journal article supplement (https://www.dovepress.com/article/440034)
Supplement: Supplementary file 1 [file get_supplementary_file.php]

1 SUPPORTING INFORMATION

2 **Microcurrent cloth-assisted transdermal penetration and**  
3 **follicular ducts escape of curcumin-loaded micelles for**  
4 **enhanced wound healing**

5 Pei-Chi Lee<sup>1,†</sup>, Cun-Zhao Li<sup>2,†</sup>, Chun-Te Lu<sup>3,†</sup>, Ming-Han Zhao<sup>2</sup>, Syu-Ming Lai<sup>2</sup>, Man-Hua Liao<sup>4</sup>,  
6 Cheng-Liang Peng<sup>5</sup>, Hsin-Tung Liu<sup>1</sup>, Ping-Shan Lai<sup>1\*</sup>

7

8 <sup>1</sup> xTrans Corporate Research and Innovation Center, Taipei City, Taiwan

9 <sup>2</sup> Department of Chemistry, National Chung Hsing University, Taichung, Taiwan

10 <sup>3</sup> Plastic Surgery, Taichung Veterans General Hospital, Taichung, Taiwan

11 <sup>4</sup> Graduate Institute of Biotechnology, National Chung Hsing University, Taichung, Taiwan

12 <sup>5</sup> Isotope Application Division, Institute of Nuclear Energy Research, Taoyuan, Taiwan

13

14 Correspondence: Ping-Shan Lai

15 Department of Chemistry, National Chung Hsing University, No. 145, Xingda Road, Taichung 402,  
16 Taiwan.

17 Tel: +886-4-22840411 ext. 428.

18 Fax: +886-4-22862547.

19 E-mail address: pslai@email.nchu.edu.tw

20

21 † These authors contributed equally to this work.

22

23

24

25

26

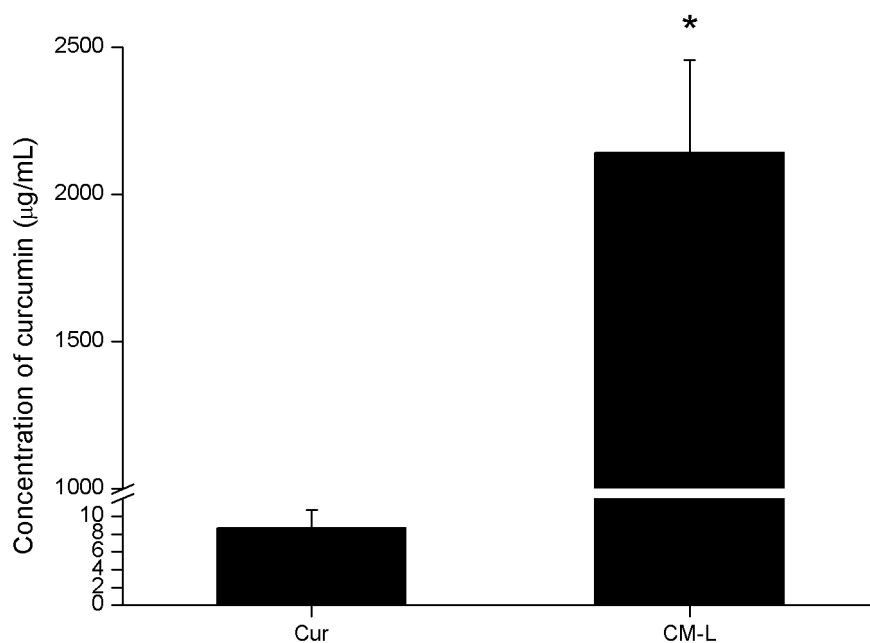

27

28 **Figure S1.** Aqueous solubility of Cur in its native form and in CM-L. Samples containing 50 mg of  
 29 curcumin were added to 2 mL eppendorf tubes with 1.5 mL water and incubated in a water bath at  
 30 37°C overnight. The supernatant was collected and then analyzed by using HPLC. Data are  
 31 expressed as the mean  $\pm$  SD (n = 3). Statistically significant differences are indicated by \*(p < 0.05).

32 **Abbreviations:** Cur: curcumin; CM-L: curcumin-loaded micelle with large particle size; HPLC: high-  
 33 performance liquid chromatography. SD: standard deviation.

34
